# Supplementary material for: Central Role of C2H2-Type Zinc Finger-Containing Genes in Pediatric Brain Tumors
Source: MDPI journal article supplement (doi:10.3390/dna2010001), 2022-01-03
Supplement: s1 [file s1]

**Table S1.** The queries that were used for the identification of the raw data used in this study.

| Search Engine               | Query                                                                                                                                                                                                                                                                                                                                                                                                                                                                                                                                                                                                                                                                                                                                                                                                                                                                                                                                                                                                                                                                                                                                                                                                                                                                                                                                                                                                                                                                                                                                                                                                                                                                                                                                                                                                                                                                                                                                                                                                                                                                                                                              | Filters                                                        | Results                                          |
|-----------------------------|------------------------------------------------------------------------------------------------------------------------------------------------------------------------------------------------------------------------------------------------------------------------------------------------------------------------------------------------------------------------------------------------------------------------------------------------------------------------------------------------------------------------------------------------------------------------------------------------------------------------------------------------------------------------------------------------------------------------------------------------------------------------------------------------------------------------------------------------------------------------------------------------------------------------------------------------------------------------------------------------------------------------------------------------------------------------------------------------------------------------------------------------------------------------------------------------------------------------------------------------------------------------------------------------------------------------------------------------------------------------------------------------------------------------------------------------------------------------------------------------------------------------------------------------------------------------------------------------------------------------------------------------------------------------------------------------------------------------------------------------------------------------------------------------------------------------------------------------------------------------------------------------------------------------------------------------------------------------------------------------------------------------------------------------------------------------------------------------------------------------------------|----------------------------------------------------------------|--------------------------------------------------|
| ArrayExpress                | brain AND paediatric OR pediatric AND tumor OR glioma                                                                                                                                                                                                                                                                                                                                                                                                                                                                                                                                                                                                                                                                                                                                                                                                                                                                                                                                                                                                                                                                                                                                                                                                                                                                                                                                                                                                                                                                                                                                                                                                                                                                                                                                                                                                                                                                                                                                                                                                                                                                              | Homo sapiens, RNA assay, Array assay                           | 38 accessions                                    |
| European Nucleotide Archive | tax_eq(9606) AND instrument_platform="ILLUMINA" AND library_strategy="RNA-Seq" AND ( library_strategy!="ATAC-seq" AND library_strategy!="ChIP-Seq" AND library_strategy!="miRNA-Seq" AND library_strategy!="ncRNA-Seq" )                                                                                                                                                                                                                                                                                                                                                                                                                                                                                                                                                                                                                                                                                                                                                                                                                                                                                                                                                                                                                                                                                                                                                                                                                                                                                                                                                                                                                                                                                                                                                                                                                                                                                                                                                                                                                                                                                                           | Studies (study)                                                | 20201 study accessions (20191 unique accessions) |
| European Nucleotide Archive | tax_eq(9606) AND (study_name="*glioma*" OR study_title="*glioma*" OR study_description="*glioma*" OR study_name="*gliomas*" OR study_title="*gliomas*" OR study_description="*gliomas*" OR study_name="*astrocytoma*" OR study_title="*astrocytoma*" OR study_description="*astrocytoma*" OR study_name="*glioblastoma*" OR study_title="*glioblastoma*" OR study_description="*glioblastoma*" OR study_name="*medulloblastoma*" OR study_title="*medulloblastoma*" OR study_description="*medulloblastoma*" OR study_name="*ependymoma*" OR study_title="*ependymoma*" OR study_description="*ependymoma*" OR study_name="*low-grade*" OR study_title="*low-grade*" OR study_description="*low-grade*" OR study_name="*high-grade*" OR study_title="*high-grade*" OR study_description="*high-grade*" OR study_name="*GBM*" OR study_title="*GBM*" OR study_description="*GBM*" OR study_name="*brain*" OR study_title="*brain*" OR study_description="*brain*" AND ( study_name="*pediatric*" OR study_title="*pediatric*" OR study_description="*pediatric*" OR study_name="*paediatric*" OR study_title="*paediatric*" OR study_description="*paediatric*" ) AND ( study_name!="*leukemia*" OR study_title!="*leukemia*" OR study_description!="*leukemia*" OR study_name!="*adult*" OR study_title!="*adult*" OR study_description!="*adult*" OR study_name!="*microRNA*" OR study_title!="*microRNA*" OR study_description!="*microRNA*" OR study_name!="*methylation*" OR study_title!="*methylation*" OR study_description!="*methylation*" OR study_name!="*cell line*" OR study_title!="*cell line*" OR study_description!="*cell line*" OR study_name!="*lymphoma*" OR study_title!="*lymphoma*" OR study_description!="*lymphoma*" OR study_name!="*carcinoma*" OR study_title!="*carcinoma*" OR study_description!="*carcinoma*" OR study_name!="*culture*" OR study_title!="*culture*" OR study_description!="*culture*" OR study_name!="*cancers*" OR study_title!="*cancers*" OR study_description!="*cancers*" OR study_name!="*leukaemia*" OR study_title!="*leukaemia*" OR study_description!="*leukaemia*" ) ) | Studies used for raw reads (read_study)                        | 2597 study accessions                            |
|                             |                                                                                                                                                                                                                                                                                                                                                                                                                                                                                                                                                                                                                                                                                                                                                                                                                                                                                                                                                                                                                                                                                                                                                                                                                                                                                                                                                                                                                                                                                                                                                                                                                                                                                                                                                                                                                                                                                                                                                                                                                                                                                                                                    | 668 overlapping accessions across read_study and study domains |                                                  |
